# Supplementary material
Source: HighWire-hosted journal article supplement (http://www.qdcxjkg.com/highwire/filestream/113934/field_highwire_adjunct_files/1/Fukui_BPA_MRI_Fig_ERJ_R1_online.pdf)

**A**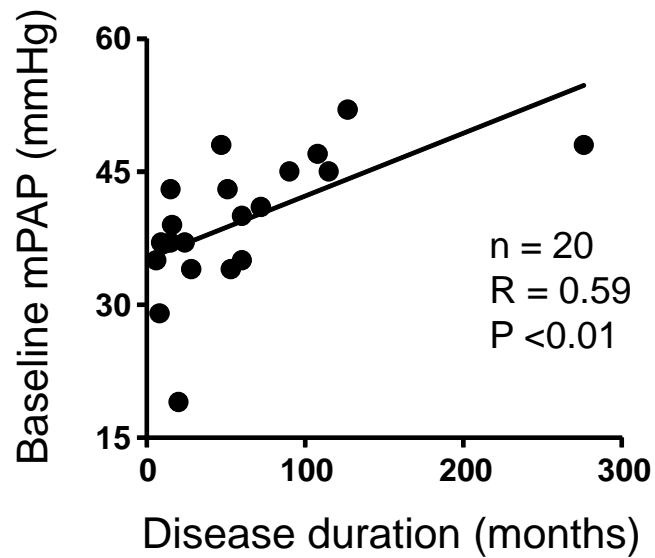**B**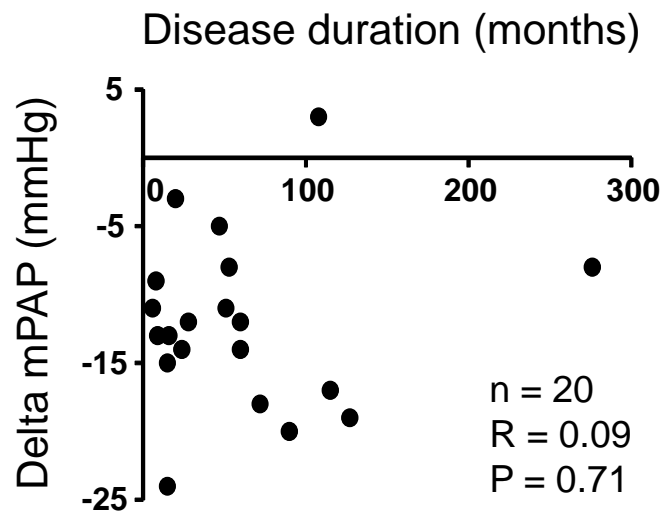**C**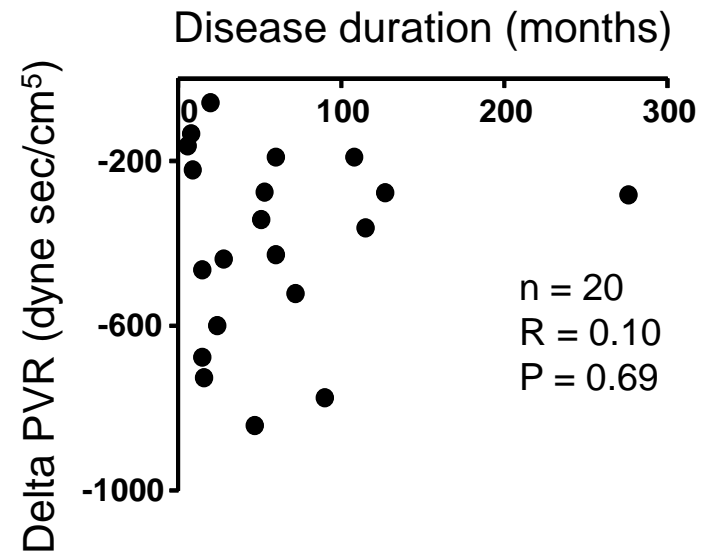**D**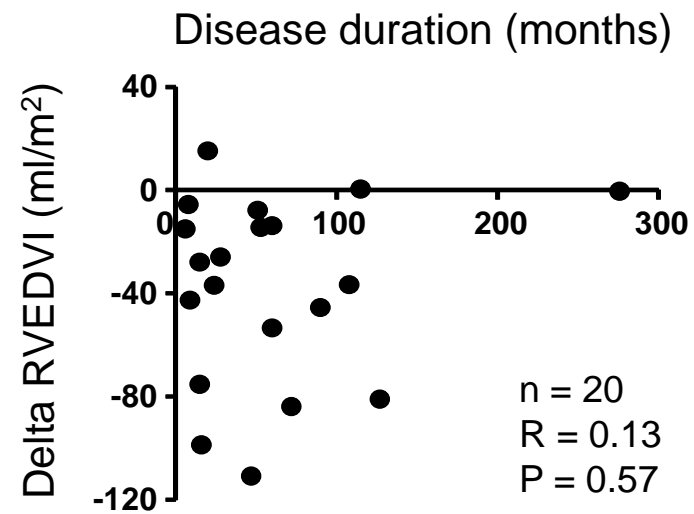

**A**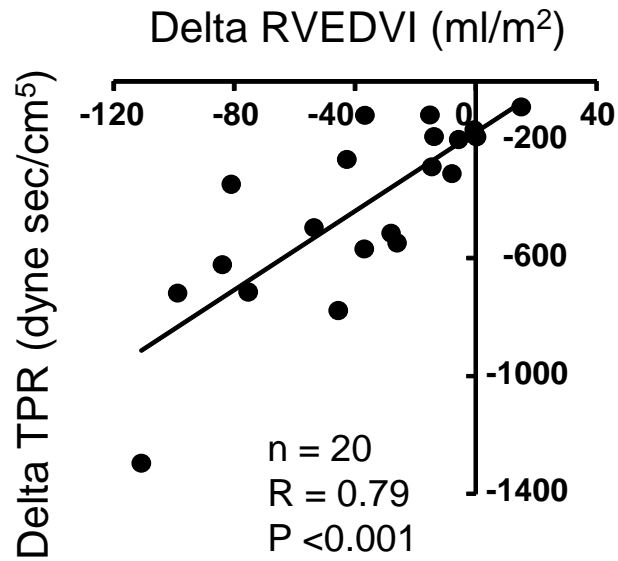**B**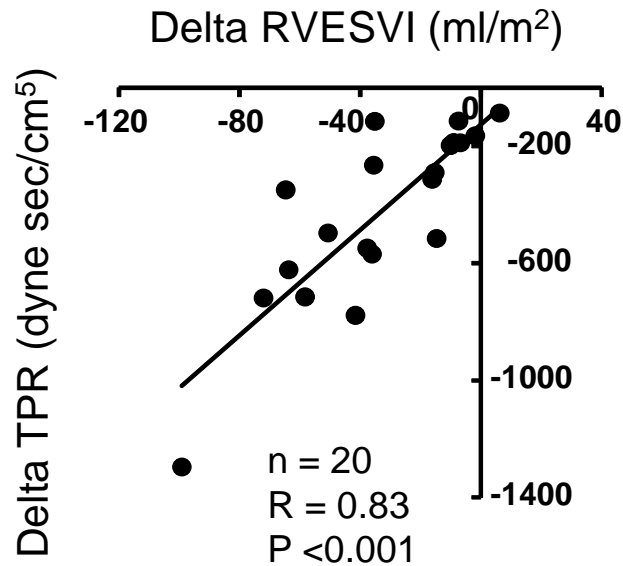**C**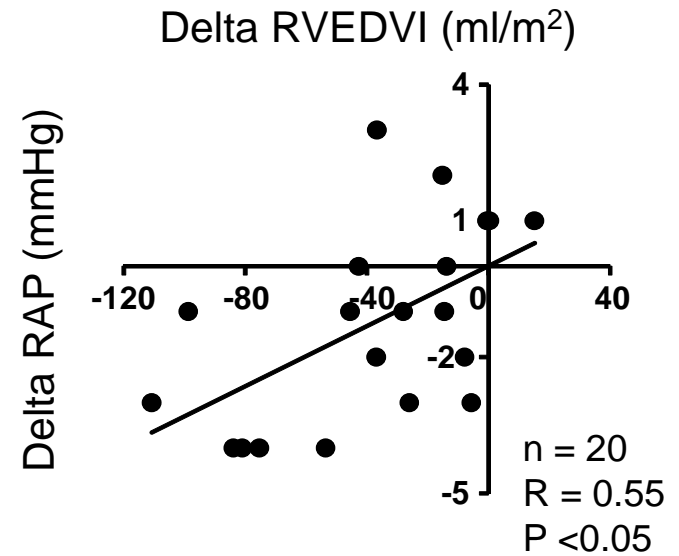**D**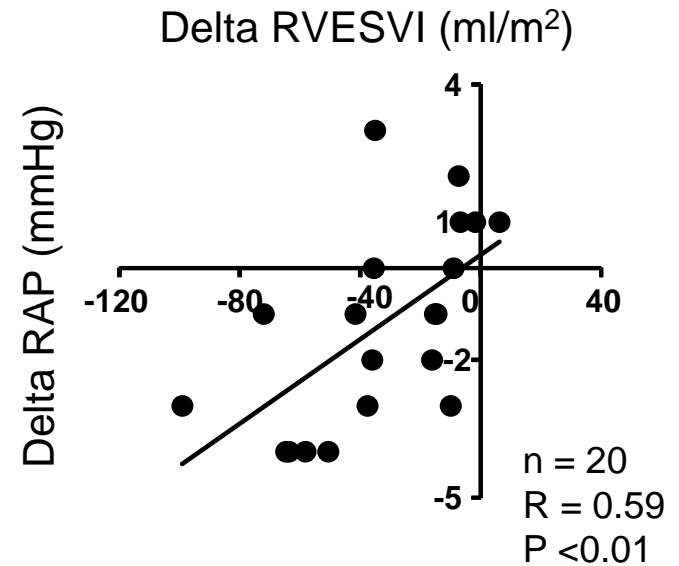

Supplement: Fukui_BPA_MRI_Fig_ERJ_R1_online.pdf [file Fukui_BPA_MRI_Fig_ERJ_R1_online.pdf]
